# Supplementary material for: Are Borrmann’s Types of Advanced Gastric Cancer Distinct Clinicopathological and Molecular Entities? A Western Study
Source: MDPI journal article supplement (doi:10.3390/cancers13123081), 2021-06-21
Supplement: s1 [file s1]

**Table S1.** Correlation between Borrmann types and the TNM classification.

|          |     | <b>Type I</b> | <b>Type II</b> | <b>Type III</b> | <b>Type IV</b> | <b>p</b> |
|----------|-----|---------------|----------------|-----------------|----------------|----------|
| <b>T</b> | T2  | 33.3%         | 20.2%          | 23.1%           | 16.7%          | 0.494    |
|          | T3  | 55.6%         | 59.6%          | 61.5%           | 58.3%          |          |
|          | T4  | 11.1%         | 20.2%          | 15.3%           | 25%            |          |
|          | N+  | 64.4%         | 71.9%          | 65.3%           | 68.2%          | 0.770    |
| TNM      | I   | 17.8%         | 7.9%           | 19.2%           | 9.1%           | 0.345    |
|          | II  | 33.3%         | 41.6%          | 30.8%           | 31.8%          |          |
|          | III | 48.9%         | 50.6%          | 28.9%           | 59%            |          |
